# Supplementary material for: Global Expansion of Jeffrey’s Insights: Jeffrey Modell Foundation’s Genetic Sequencing Program for Primary Immunodeficiency
Source: PubMed Central journal article supplement (PMC9226364; doi:10.3389/fimmu.2022.906540), 2022-06-10
Supplement: DataSheet_1.pdf [file DataSheet_1.pdf]

## *Supplementary Material*

**Supplementary Table 1. Molecular diagnoses by gene.** Positive gene results are organized by the 2019 IUIS categories and the total number of individuals with positive molecular diagnoses in each gene are indicated. Rows in bold indicate homozygous variants.

| IUIS Category                                             | IUIS Table                      | Gene    | No. of Patients | Genotypes                                     | Effect                      |
|-----------------------------------------------------------|---------------------------------|---------|-----------------|-----------------------------------------------|-----------------------------|
| Immunodeficiencies affecting cellular or humoral immunity | 1                               | ADA     | 5               | NM_000022.2:c.1021_1022del                    | <b>p.Arg341Glyfs*8</b>      |
|                                                           |                                 |         |                 | NM_000022.2:c.218+1G>A                        | <b>Splice donor</b>         |
|                                                           |                                 |         |                 | NM_000022.2:c.320T>C                          | <b>p.Leu107Pro</b>          |
|                                                           |                                 |         |                 | NM_000022.2:c.646G>A;<br>NM_000022.2:c.302G>A | p.Gly216Arg;<br>p.Arg101Gln |
|                                                           |                                 |         |                 | NM_000022.2:c.704G>A;<br>NM_000022.2:c.646G>A | p.Arg235Gln;<br>p.Gly216Arg |
|                                                           |                                 | CD3D    | 2               | <b>NM_000732.4:c.202C&gt;T</b>                | <b>p.Arg68*</b>             |
|                                                           |                                 | CD40LG  | 7               | NM_000074.2:c.289-<br>?_346+?del              | Deletion (Exon 3)           |
|                                                           |                                 |         |                 | NM_000074.2:c.31C>T                           | p.Arg11*                    |
|                                                           |                                 |         |                 | NM_000074.2:c.347-<br>?*975+?del              | Deletion (Exons 4-5)        |
|                                                           |                                 |         |                 | NM_000074.2:c.418T>C                          | p.Trp140Arg                 |
|                                                           |                                 |         |                 | NM_000074.2:c.474del                          | p.Lys159Asnfs*3             |
|                                                           |                                 |         |                 | NM_000074.2:c.761C>T                          | p.Thr254Met                 |
|                                                           |                                 | DCLRE1C | 4               | <b>NM_001033855.2:c.-422-<br/>?_246+?del</b>  | <b>Deletion (Exons 1-3)</b> |
|                                                           |                                 |         |                 | <b>NM_001033855.2:c.1299_1306<br/>dup</b>     | <b>p.Cys436*</b>            |
|                                                           |                                 | DOCK2   | 2               | <b>NM_004946.2:c.316dup</b>                   | <b>p.Tyr106Leufs*35</b>     |
| NM_004946.2:c.4786C>T;<br>NM_004946.2:c.1348_1349del      | p.Arg1596*;<br>p.Met450Valfs*12 |         |                 |                                               |                             |

Supplementary Material

|                                 |       |                                |                                                 |                              |
|---------------------------------|-------|--------------------------------|-------------------------------------------------|------------------------------|
|                                 | DOCK8 | 4                              | NM_203447.3:c.54-?_1285+?del                    | Deletion (Exons 2-11)        |
|                                 |       |                                | NM_203447.3:c.5161C>T;<br>NM_203447.3:c.5481dup | p.Gln1721*; p.Arg1828*       |
|                                 |       |                                | <b>NM_203447.3:c.54-?_404+?del</b>              | <b>Deletion (Exons 2-4)</b>  |
|                                 |       |                                | <b>NM_203447.3:c.828-?_1125+?del</b>            | <b>Deletion (Exons 8-10)</b> |
|                                 | IL2RG | 10                             | NM_000206.2:c.116-2A>G                          | Splice acceptor              |
|                                 |       |                                | NM_000206.2:c.216C>A                            | p.Cys72*                     |
|                                 |       |                                | NM_000206.2:c.328G>T                            | p.Glu110*                    |
|                                 |       |                                | NM_000206.2:c.713G>A                            | p.Ser238Asn                  |
|                                 |       |                                | NM_000206.2:c.758-2A>G                          | Splice acceptor              |
|                                 |       |                                | NM_000206.2:c.854G>A                            | p.Arg285Gln                  |
|                                 |       |                                | NM_000206.2:c.855-1G>A                          | Splice acceptor              |
|                                 |       |                                | NM_000206.2:c.865C>T                            | p.Arg289*                    |
|                                 |       |                                | NM_000206.2:c.982C>T                            | p.Arg328*                    |
|                                 | IL7R  | 5                              | <b>NM_002185.3:c.353G&gt;A</b>                  | <b>p.Cys118Tyr</b>           |
|                                 |       |                                | NM_002185.3:c.662G>T;<br>NM_002185.3:c.83-2A>T  | p.Ser221Ile; Splice acceptor |
|                                 |       |                                | <b>NM_002185.3:c.83-2A&gt;T</b>                 | <b>Splice acceptor</b>       |
|                                 | JAK3  | 2                              | <b>NM_000215.3:c.1142+1G&gt;C</b>               | <b>Splice donor</b>          |
|                                 |       |                                | <b>NM_000215.3:c.1645C&gt;T</b>                 | <b>p.Arg549*</b>             |
|                                 | NHEJ1 | 1                              | <b>NM_024782.2:c.178-1G&gt;A</b>                | <b>Splice acceptor</b>       |
|                                 | RAG1  | 3                              | NM_000448.2:c.2275C>T;<br>NM_000448.2:c.1228C>T | p.Arg759Cys;<br>p.Arg410Trp  |
| <b>NM_000448.2:c.256_257del</b> |       |                                | <b>p.Lys86Valfs*33</b>                          |                              |
| <b>NM_000448.2:c.2689C&gt;T</b> |       |                                | <b>p.Arg897*</b>                                |                              |
|                                 |       | <b>NM_000536.3:c.475C&gt;T</b> | <b>p.Arg159Cys</b>                              |                              |

|                                                                |   |                                                       |                                      |                                                      |                                   |
|----------------------------------------------------------------|---|-------------------------------------------------------|--------------------------------------|------------------------------------------------------|-----------------------------------|
|                                                                |   | RAG2                                                  | 2                                    | NM_000536.3:c.686G>A                                 | p.Arg229Gln                       |
|                                                                |   | RFX5                                                  | 1                                    | NM_000449.3:c.367_368del                             | p.Leu124Cysfs*21                  |
|                                                                |   | RFXANK                                                | 1                                    | NM_003721.3:c.383del                                 | p.Leu128Profs*76                  |
|                                                                |   | STK4                                                  | 1                                    | NM_006282.3:c.349C>T                                 | p.Arg117*                         |
|                                                                |   | ZAP70                                                 | 2                                    | NM_001079.3:c.1518C>A                                | p.Tyr506*                         |
|                                                                |   |                                                       |                                      | NM_001079.3:c.261C>G                                 | p.Tyr87*                          |
| Combined immunodeficiencies associated with syndromic features | 2 | ATM                                                   | 8                                    | NM_000051.3:c.186-?_3284+?del                        | Deletion (Exons 4-22)             |
|                                                                |   |                                                       |                                      | NM_000051.3:c.2921+1G>A;<br>NM_000051.3:c.3802del    | Splice donor;<br>p.Val1268*       |
|                                                                |   |                                                       |                                      | NM_000051.3:c.3894dup                                | p.Ala1299Cysfs*3                  |
|                                                                |   |                                                       |                                      | NM_000051.3:c.4019_4029del;<br>NM_000051.3:c.2817del | p.Leu1340Cysfs*10;p.Lys940Asnfs*9 |
|                                                                |   |                                                       |                                      | NM_000051.3:c.8584+2T>C;<br>NM_000051.3:c.8147T>C    | Splice donor;<br>p.Val2716Ala     |
|                                                                |   |                                                       |                                      | NM_000051.3:c.8851-?_*3591+?del                      | Deletion (Exons 62-63)            |
|                                                                |   |                                                       |                                      | NM_000051.3:c.8883dup                                | p.Met2962Hisfs*16                 |
|                                                                |   | CHD7                                                  | 1                                    | NM_017780.3:c.4944_4945del                           | p.Tyr1649Leufs*3                  |
|                                                                |   | DNMT3B                                                | 1                                    | NM_006892.3:c.2292G>T;<br>NM_006892.3:c.1838T>C      | p.Arg764Ser;<br>p.Val613Ala       |
|                                                                |   | EPG5                                                  | 2                                    | NM_020964.2:c.2662A>T                                | p.Lys888*                         |
|                                                                |   |                                                       |                                      | NM_020964.2:c.5583C>A                                | p.Cys1861*                        |
|                                                                |   | ERCC6L2                                               | 2                                    | NM_020207.4:c.1963C>T                                | p.Arg655*                         |
|                                                                |   |                                                       |                                      | NM_020207.4:c.3603_3607dup;<br>NM_020207.4:c.1963C>T | p.Pro1203Hisfs*10;<br>p.Arg655*   |
| FOXN1                                                          | 1 | NM_003593.2:c.1201_1216del                            | p.Pro401Alafs*144                    |                                                      |                                   |
| NBN                                                            | 1 | NM_002485.4:c.657_661del;<br>NM_002485.4:c.808_809del | p.Lys219Asnfs*16;<br>p.Val270Cysfs*2 |                                                      |                                   |

Supplementary Material

|                          |           |        |    |                                                                   |                                         |
|--------------------------|-----------|--------|----|-------------------------------------------------------------------|-----------------------------------------|
|                          |           | NFKBIA | 1  | NM_020529.2:c.95G>A                                               | p.Ser32Asn                              |
|                          |           | PNP    | 2  | NM_000270.3:c.244C>T                                              | p.Gln82*                                |
|                          |           |        |    | NM_000270.3:c.547dup                                              | p.Glu183Glyfs*4                         |
|                          |           | SP110  | 2  | NM_004509.3:c.1116_1119del;<br>NM_004509.3:c.1448-<br>?_1590+?del | p.Arg373Serfs*22;<br>Deletion (Exon 14) |
|                          |           |        |    | NM_004509.3:c.686dup                                              | p.Gln231Profs*5                         |
|                          |           | TBX1   | 10 | NM_080647.1:c.-129-<br>?_*465+?del                                | Deletion (Entire coding<br>sequence)    |
| Antibody<br>deficiencies | 3         | AICDA  | 1  | NM_020661.2:c.544-2A>G                                            | Splice acceptor                         |
|                          |           | BTK    | 13 | c.216_220delins15                                                 | p.Pro73Leufs*15                         |
|                          |           |        |    | NM_000061.2:c.119A>G                                              | p.Tyr40Cys                              |
|                          |           |        |    | NM_000061.2:c.1420dup                                             | p.Thr474Asnfs*2                         |
|                          |           |        |    | NM_000061.2:c.1558C>T                                             | p.Arg520*                               |
|                          |           |        |    | NM_000061.2:c.1574G>A                                             | p.Arg525Gln                             |
|                          |           |        |    | NM_000061.2:c.1631+5G>C                                           | Intronic                                |
|                          |           |        |    | NM_000061.2:c.1684C>T                                             | p.Arg562Trp                             |
|                          |           |        |    | NM_000061.2:c.179_181del                                          | p.Lys60del                              |
|                          |           |        |    | NM_000061.2:c.1901G>C                                             | p.Trp634Ser                             |
|                          |           |        |    | NM_000061.2:c.1909-<br>?_*438+?del                                | Deletion (Exon 19)                      |
|                          |           |        |    | NM_000061.2:c.1931T>C                                             | p.Phe644Ser                             |
|                          |           |        |    | NM_000061.2:c.496C>T                                              | p.Gln166*                               |
|                          |           |        |    | NM_000061.2:c.520+1G>A                                            | Splice donor                            |
|                          |           | NFKB1  | 6  | NM_003998.3:c.-467-<br>?_*708+?del                                | Deletion (Entire coding<br>sequence)    |
| NM_003998.3:c.2265T>A    | p.Tyr755* |        |    |                                                                   |                                         |
| NM_003998.3:c.2382T>G    | p.Tyr794* |        |    |                                                                   |                                         |

|                                   |   |        |   |                                                    |                                |
|-----------------------------------|---|--------|---|----------------------------------------------------|--------------------------------|
|                                   |   |        |   | NM_003998.3:c.357_358del                           | p.Cys119*                      |
|                                   |   |        |   | NM_003998.3:c.836-1G>A                             | Splice acceptor                |
|                                   |   |        |   | NM_003998.3:c.879_880del                           | p.Val294Leufs*14               |
|                                   |   | NFKB2  | 1 | NM_001077494.3:c.2611C>T                           | p.Gln871*                      |
|                                   |   | PIK3CD | 5 | NM_005026.3:c.241G>A                               | p.Glu81Lys                     |
|                                   |   |        |   | NM_005026.3:c.3061G>A                              | p.Glu1021Lys                   |
|                                   |   | PIK3R1 | 4 | NM_181523.2:c.1344dup                              | p.Leu449Ilefs*3                |
|                                   |   |        |   | NM_181523.2:c.1425+1G>A                            | Splice donor                   |
|                                   |   |        |   | NM_181523.2:c.1425+1G>T                            | Splice donor                   |
|                                   |   | TCF3   | 2 | Alternate transcript<br>NM_001136139.3:c.1663G>A   | p.Glu555Lys                    |
| Disorders of immune dysregulation | 4 | AIRE   | 2 | <b>NM_000383.3:c.560C&gt;G</b>                     | <b>p.Ser187*</b>               |
|                                   |   |        |   | NM_000383.3:c.967_979del;<br>NM_000383.3:c.1045C>T | p.Leu323Serfs*51;<br>p.Gln349* |
|                                   |   | AP3B1  | 1 | <b>NM_003664.4:c.779G&gt;A</b>                     | <b>p.Trp260*</b>               |
|                                   |   | CTLA4  | 2 | c.38_43delinsCTGGCACA                              | p.Leu13Profs*60                |
|                                   |   |        |   | NM_005214.4:c.238C>T                               | p.Gln80*                       |
|                                   |   | FAS    | 2 | NM_000043.5:c.197-1G>A                             | Splice acceptor                |
|                                   |   |        |   | NM_000043.5:c.442A>T                               | p.Lys148*                      |
|                                   |   | FOXP3  | 4 | NM_014009.3:c.1099T>C                              | p.Phe367Leu                    |
|                                   |   |        |   | NM_014009.3:c.1150G>A                              | p.Ala384Thr                    |
|                                   |   |        |   | NM_014009.3:c.2T>A                                 | p.Met1?                        |
|                                   |   | LRBA   | 5 | <b>NM_006726.4:c.3286_3287del</b>                  | <b>p.Phe1096Leufs*3</b>        |
|                                   |   |        |   | <b>NM_006726.4:c.5581-<br/>?_5645+?del</b>         | <b>Deletion (Exon 35)</b>      |
|                                   |   |        |   | <b>NM_006726.4:c.5755-<br/>?_5921+?dup</b>         | <b>Gain (Exon 37)</b>          |
|                                   |   |        |   | <b>NM_006726.4:c.7970T&gt;G</b>                    | <b>p.Ile2657Ser</b>            |

|  |  |                |          |                                                               |                                              |
|--|--|----------------|----------|---------------------------------------------------------------|----------------------------------------------|
|  |  |                |          | <b>NM_006726.4:c.893del</b>                                   | <b>p.Lys298Serfs*7</b>                       |
|  |  | <b>LYST</b>    | <b>4</b> | <b>NM_000081.3:c.193-<br/>?_*1909+?del</b>                    | <b>Deletion (Exons 4-53)</b>                 |
|  |  |                |          | NM_000081.3:c.2832del;<br>NM_000081.3:c.1406T>A               | p.Ser945Leufs*29;<br>p.Leu469*               |
|  |  |                |          | <b>NM_000081.3:c.3713-<br/>?_4862+?dup</b>                    | <b>Gain (Exons 9-14)</b>                     |
|  |  |                |          | NM_000081.3:c.6254-<br>?_*1909+?del;<br>NM_000081.3:c.9449del | Deletion (Exons 23-53);<br>p.Asn3150Thrfs*35 |
|  |  | <b>PEPD</b>    | <b>1</b> | <b>NM_000285.3:c.504-1G&gt;A</b>                              | <b>Splice acceptor</b>                       |
|  |  | <b>PRF1</b>    | <b>1</b> | <b>NM_001083116.1:c.445G&gt;A</b>                             | <b>p.Gly149Ser</b>                           |
|  |  | <b>RASGRP1</b> | <b>2</b> | <b>NM_005739.3:c.1633C&gt;T</b>                               | <b>p.Gln545*</b>                             |
|  |  |                |          | <b>NM_005739.3:c.2180G&gt;A</b>                               | <b>p.Trp727*</b>                             |
|  |  | <b>SH2D1A</b>  | <b>4</b> | NM_002351.4:c.-361-<br>?_*1769+?del                           | Deletion (Entire coding<br>sequence)         |
|  |  |                |          | NM_002351.4:c.158C>T                                          | p.Thr53Ile                                   |
|  |  |                |          | NM_002351.4:c.163C>T                                          | p.Arg55*                                     |
|  |  | <b>STAT1</b>   | <b>4</b> | NM_007315.3:c.820C>T                                          | p.Arg274Trp                                  |
|  |  |                |          | NM_007315.3:c.862A>G                                          | p.Thr288Ala                                  |
|  |  | <b>STXBP2</b>  | <b>3</b> | <b>NM_006949.3:c.1247-1G&gt;C</b>                             | <b>Splice acceptor</b>                       |
|  |  |                |          | <b>NM_006949.3:c.1621G&gt;A</b>                               | <b>p.Gly541Ser</b>                           |
|  |  | <b>UNC13D</b>  | <b>1</b> | <b>NM_199242.2:c.766C&gt;T</b>                                | <b>p.Arg256*</b>                             |
|  |  | <b>XIAP</b>    | <b>4</b> | NM_001167.3:c.1141C>T                                         | p.Arg381*                                    |
|  |  |                |          | NM_001167.3:c.664C>T                                          | p.Arg222*                                    |
|  |  |                |          | NM_001167.3:c.894_898del                                      | p.Lys299Leufs*9                              |
|  |  |                |          | NM_001167.3:c.978-<br>?_1099+?del                             | Deletion (Exons 4-5)                         |

|                                                    |             |                       |           |                                |                                   |
|----------------------------------------------------|-------------|-----------------------|-----------|--------------------------------|-----------------------------------|
| Congenital defects of phagocyte number or function | 5           | CTSC                  | 1         | Complex rearrangement          | Exons 1-3                         |
|                                                    |             | CYBA                  | 1         | NM_000101.3:c.385G>T           | p.Glu129*                         |
|                                                    |             | CYBB                  | 10        | NM_000397.3:c.-61-?_*2544+?del | Deletion (Entire coding sequence) |
|                                                    |             |                       |           | NM_000397.3:c.1012C>T          | p.His338Tyr                       |
|                                                    |             |                       |           | NM_000397.3:c.1519C>T          | p.Gln507*                         |
|                                                    |             |                       |           | NM_000397.3:c.252+5G>C         | Intronic                          |
|                                                    |             |                       |           | NM_000397.3:c.253-8A>G         | Intronic                          |
|                                                    |             |                       |           | NM_000397.3:c.469C>T           | p.Arg157*                         |
|                                                    |             |                       |           | NM_000397.3:c.565del           | p.Ile189Leufs*25                  |
|                                                    |             |                       |           | NM_000397.3:c.675-2A>G         | Splice acceptor                   |
|                                                    |             |                       |           | NM_000397.3:c.676C>T           | p.Arg226*                         |
|                                                    |             |                       |           | NM_000397.3:c.742dup           | p.Ile248Asnfs*36                  |
|                                                    |             | ELANE                 | 5         | NM_001972.2:c.367-8C>A         | Intronic                          |
|                                                    |             |                       |           | NM_001972.2:c.377C>T           | p.Ser126Leu                       |
|                                                    |             |                       |           | NM_001972.2:c.597+1G>A         | Splice donor                      |
|                                                    |             |                       |           | NM_001972.2:c.607G>C           | p.Gly203Arg                       |
|                                                    |             | G6PD                  | 12        | c.[202G>A;376A>G]              | p.[Val68Met;Asn126Asp]            |
|                                                    |             |                       |           | c.[376A>G;968T>C]              | p.[Asn126Asp;Leu323Pro]           |
|                                                    |             |                       |           | NM_001042351.2:c.1360C>T       | p.Arg454Cys                       |
|                                                    |             |                       |           | NM_001042351.2:c.392G>T        | p.Gly131Val                       |
|                                                    |             |                       |           | NM_001042351.2:c.563C>T        | p.Ser188Phe                       |
| NM_001042351.2:c.844G>C                            | p.Asp282His |                       |           |                                |                                   |
| NM_001042351.2:c.871G>A                            | p.Val291Met |                       |           |                                |                                   |
| NM_001042351.2:c.949G>A                            | p.Glu317Lys |                       |           |                                |                                   |
|                                                    |             | NM_032638.4:c.1019C>A | p.Ser340* |                                |                                   |

|                                          |                  |                                                     |                     |                                                         |                                   |
|------------------------------------------|------------------|-----------------------------------------------------|---------------------|---------------------------------------------------------|-----------------------------------|
|                                          |                  | GATA2                                               | 3                   | NM_032638.4:c.1081C>T                                   | p.Arg361Cys                       |
|                                          |                  |                                                     |                     | NM_032638.4:c.437dup                                    | p.Gly147Trpfs*38                  |
|                                          |                  | ITGB2                                               | 1                   | <b>NM_000211.4:c.562C&gt;T</b>                          | <b>p.Arg188*</b>                  |
|                                          |                  | NCF2                                                | 2                   | <b>NM_000433.3:c.669+1G&gt;A</b>                        | <b>Splice donor</b>               |
|                                          |                  |                                                     |                     | NM_000433.3:c.714-?_924+?dup;<br>NM_000433.3:c.367-1G>A | Gain (Exons 8-9); Splice acceptor |
| SRP54                                    | 2                | NM_003136.3:c.349_351del                            | p.Thr117del         |                                                         |                                   |
| Defects in Intrinsic and Innate Immunity | 6                | CXCR4                                               | 3                   | NM_003467.2:c.1000C>T                                   | p.Arg334*                         |
|                                          |                  | IFNGR1                                              | 2                   | NM_000416.2:c.781del                                    | p.Ser262Alafs*15                  |
|                                          |                  |                                                     |                     | NM_000416.2:c.819_822del                                | p.Asn274Hisfs*2                   |
|                                          |                  | IL12B                                               | 1                   | <b>NM_002187.2:c.482+1G&gt;T</b>                        | <b>Splice donor</b>               |
|                                          |                  | IL12RB1                                             | 3                   | <b>NM_005535.2:c.1456C&gt;T</b>                         | <b>p.Arg486*</b>                  |
|                                          |                  |                                                     |                     | <b>NM_005535.2:c.1791+2T&gt;G</b>                       | <b>Splice donor</b>               |
| <b>NM_005535.2:c.962C&gt;A</b>           | <b>p.Ser321*</b> |                                                     |                     |                                                         |                                   |
| IRAK4                                    | 1                | NM_016123.3:c.1135G>T;<br>NM_016123.3:c.1188+520A>G | p.Glu379*; Intronic |                                                         |                                   |
| Autoinflammatory disorders               | 7                | ADA2                                                | 3                   | <b>NM_001282225.1:c.1085G&gt;A</b>                      | <b>p.Trp362*</b>                  |
|                                          |                  |                                                     |                     | <b>NM_001282225.1:c.1358A&gt;G</b>                      | <b>p.Tyr453Cys</b>                |
|                                          |                  |                                                     |                     | NM_001282225.1:c.973-2A>G;<br>NM_001282225.1:c.934C>T   | Splice acceptor;<br>p.Arg312*     |
|                                          |                  | CARD14                                              | 1                   | NM_024110.4:c.349G>A                                    | p.Gly117Ser                       |
|                                          |                  | MVK                                                 | 1                   | <b>NM_000431.3:c.829C&gt;T</b>                          | <b>p.Arg277Cys</b>                |
|                                          |                  | NLRP3                                               | 2                   | NM_004895.4:c.1219A>C                                   | p.Thr407Pro                       |
|                                          |                  |                                                     |                     | NM_004895.4:c.784C>T                                    | p.Arg262Trp                       |
|                                          |                  | NOD2                                                | 1                   | NM_022162.2:c.1538T>C                                   | p.Met513Thr                       |
| PSTPIP1                                  | 1                | NM_003978.3:c.688G>A                                | p.Ala230Thr         |                                                         |                                   |



|                         |          |         |    |                                                 |                                     |                      |
|-------------------------|----------|---------|----|-------------------------------------------------|-------------------------------------|----------------------|
|                         |          | TMEM173 | 1  | NM_198282.3:c.461A>G                            | p.Asn154Ser                         |                      |
|                         |          | TNFAIP3 | 3  | NM_006290.3:c.120del                            | p.Phe40Leufs*56                     |                      |
|                         |          |         |    | NM_006290.3:c.1904_1905del                      | p.Lys635Thrfs*36                    |                      |
|                         |          |         |    | NM_006290.3:c.547C>T                            | p.Arg183*                           |                      |
| Complement deficiencies | 8        | C6      | 1  | NM_000065.3:c.1138del;<br>NM_000065.3:c.1879del | p.Gln380Serfs*7;<br>p.Asp627Thrfs*4 |                      |
|                         |          | CFI     | 1  | NM_000204.4:c.772G>A                            | p.Ala258Thr                         |                      |
|                         | SERPING1 | 9       |    |                                                 | NM_000062.2:c.-191-<br>?_550+?del   | Deletion (Exons 1-3) |
|                         |          |         |    |                                                 | NM_000062.2:c.1250-1G>C             | Splice acceptor      |
|                         |          |         |    |                                                 | NM_000062.2:c.1361del               | p.Val454Glyfs*122    |
|                         |          |         |    |                                                 | NM_000062.2:c.305_317del            | p.Pro102Leufs*42     |
|                         |          |         |    |                                                 | NM_000062.2:c.550G>A                | p.Gly184Arg          |
|                         |          |         |    |                                                 | NM_000062.2:c.685+1G>A              | Splice donor         |
|                         |          |         |    | NM_000062.2:c.686-<br>?_1029+?del               | Deletion (Exons 5-6)                |                      |
| Bone marrow failure     | 9        | PARN    | 1  | Partial Deletion                                | Exon 19                             |                      |
|                         |          | RTEL1   | 1  | NM_001283009.1:c.1266+3_1266+80del              | Intronic                            |                      |
| Multiple IUIS tables    | 1, 2, 3  | CARD11  | 2  | NM_032415.5:c.146G>A                            | p.Cys49Tyr                          |                      |
|                         |          |         |    | NM_032415.5:c.368G>A                            | p.Gly123Asp                         |                      |
|                         | 1, 3, 5  | RAC2    | 1  | NM_002872.4:c.184G>A                            | p.Glu62Lys                          |                      |
|                         | 2, 4     | STAT3   | 12 |                                                 | NM_139276.2:c.1144C>T               | p.Arg382Trp          |
|                         |          |         |    |                                                 | NM_139276.2:c.1145G>A               | p.Arg382Gln          |
|                         |          |         |    |                                                 | NM_139276.2:c.1387_1389del          | p.Val463del          |
|                         |          |         |    |                                                 | NM_139276.2:c.1859C>G               | p.Thr620Ser          |
|                         |          |         |    |                                                 | NM_139276.2:c.1910T>C               | p.Val637Ala          |
| NM_139276.2:c.1976T>A   |          |         |    |                                                 | p.Ile659Asn                         |                      |

|                                           |            |                                               |                             |                                 |                    |
|-------------------------------------------|------------|-----------------------------------------------|-----------------------------|---------------------------------|--------------------|
|                                           |            |                                               |                             | NM_139276.2:c.2116C>A           | p.Leu706Met        |
|                                           |            |                                               |                             | NM_139276.2:c.861G>T            | p.Leu287Phe        |
|                                           | 2, 5       | WAS                                           | 8                           | NM_000377.2:c.1085del           | p.Pro362Glnfs*83   |
|                                           |            |                                               |                             | NM_000377.2:c.121C>T            | p.Arg41*           |
|                                           |            |                                               |                             | NM_000377.2:c.1271dup           | p.Leu425Profs*70   |
|                                           |            |                                               |                             | NM_000377.2:c.1339-2A>G         | Splice acceptor    |
|                                           |            |                                               |                             | NM_000377.2:c.176del            | p.Pro59Leufs*17    |
|                                           |            |                                               |                             | NM_000377.2:c.723del            | p.Ser242Valfs*19   |
| NM_000377.2:c.91G>A                       | p.Glu31Lys |                                               |                             |                                 |                    |
| Not in IUIS, but has overlapping symptoms | N/A        | CBL                                           | 1                           | <b>NM_005188.3:c.1111T&gt;C</b> | <b>p.Tyr371His</b> |
|                                           |            |                                               |                             | DUOX2                           | 5                  |
|                                           |            | <b>NM_014080.4:c.1461_1462deletionsCA</b>     | <b>p.Gly488Arg</b>          |                                 |                    |
|                                           |            | NM_014080.4:c.1588A>T                         | p.Lys530*                   |                                 |                    |
|                                           |            | NM_014080.4:c.1606C>T                         | p.Arg536*                   |                                 |                    |
|                                           |            | Partial Deletion                              | Exon 23                     |                                 |                    |
| PMM2                                      | 1          | NM_000303.2:c.422G>A;<br>NM_000303.2:c.385G>A | p.Arg141His;<br>p.Val129Met |                                 |                    |

Note: This table lists known pathogenic or likely pathogenic variants in adherence with the American College of Medical Genetics guidelines. Variants of unknown significance are not listed in this table and are not independently validated.

**Supplementary Table 2. Genes on the 207 gene PI panel and their associated conditions**

| <b>Gene</b> | <b>Condition(s)</b>                                   |
|-------------|-------------------------------------------------------|
| ACD         | AD/AR-DKC due to TPP1 deficiency                      |
| ACP5        | Spondyloenchondro-dysplasia with immune dysregulation |
| ACTB        | β-actin deficiency                                    |
| ADA         | Adenosine deaminase (ADA) deficiency                  |
| ADA2        | ADA2 deficiency                                       |

|         |                                                                                         |
|---------|-----------------------------------------------------------------------------------------|
| ADAM17  | ADAM17 deletion                                                                         |
| ADAR    | ADAR1 deficiency, Aicardi-Goutieres syndrome 6                                          |
| AICDA   | AID deficiency                                                                          |
| AIRE    | APECED (APS-1), autoimmune polyendocrinopathy with candidiasis and ectodermal dystrophy |
| AK2     | Reticular dysgenesis, AK2 deficiency                                                    |
| AP3B1   | Hermansky-Pudlak syndrome, type 2                                                       |
| ATM     | Ataxia-telangiectasia                                                                   |
| B2M     | MHC class I deficiency                                                                  |
| BCL10   | BCL10 deficiency                                                                        |
| BLNK    | BLNK deficiency                                                                         |
| BLOC1S6 | Hermansky-Pudlak syndrome, type 9                                                       |
| BTK     | BTK deficiency                                                                          |
| CARD11  | CARD11 deficiency, CARD11 gain of function                                              |
| CARD14  | CAMPS (CARD14 mediated psoriasis)                                                       |
| CARD9   | CARD9 deficiency                                                                        |
| CASP10  | ALPS-Caspase 10                                                                         |
| CASP8   | ALPS IIb, caspase 8 deficiency                                                          |
| CD247   | CD3 $\zeta$ deficiency                                                                  |
| CD27    | CD27 deficiency                                                                         |
| CD3D    | CD3 $\delta$ deficiency                                                                 |
| CD3E    | CD3 $\epsilon$ deficiency                                                               |
| CD3G    | CD3 $\gamma$ deficiency                                                                 |
| CD40LG  | CD40 ligand deficiency                                                                  |
| CD79A   | Ig $\alpha$ deficiency                                                                  |
| CD79B   | Ig $\beta$ deficiency                                                                   |
| CD8A    | CD8 deficiency                                                                          |
| CEBPE   | Specific granule deficiency                                                             |
| CHD7    | CHARGE syndrome                                                                         |

|         |                                                                              |
|---------|------------------------------------------------------------------------------|
| CIITA   | MHC class II deficiency                                                      |
| CLPB    | 3-Methylglutaconic aciduria                                                  |
| COPA    | COPA defect, autoimmune interstitial lung, joint, and kidney disease (AILJK) |
| CORO1A  | Coronin-1A deficiency                                                        |
| CR2     | CD21 deficiency                                                              |
| CSF2RA  | Pulmonary alveolar proteinosis                                               |
| CSF3R   | G-CSF receptor deficiency                                                    |
| CTC1    | AR-DKC due to CTC1 deficiency                                                |
| CTLA4   | CTLA4 deficiency (ALPSV)                                                     |
| CTPS1   | CTPS1 deficiency                                                             |
| CTSC    | Papillon-Lefèvre Syndrome                                                    |
| CXCR4   | WHIM (warts, hypogammaglobulinemia, infections, myelokathexis) syndrome      |
| CYBA    | Autosomal recessive CGD                                                      |
| CYBB    | X-linked chronic granulomatous disease (CGD)                                 |
| DCLRE1B | AR-DKC due to DCLRE1B deficiency                                             |
| DCLRE1C | DCLRE1C (Artemis) deficiency                                                 |
| DKC1    | XL-DKC due to Dyskerin deficiency                                            |
| DNMT3B  | Immunodeficiency with centromeric instability and facial anomalies (ICF1)    |
| DOCK2   | DOCK2 deficiency                                                             |
| DOCK8   | DOCK8 deficiency                                                             |
| ELANE   | Elastase deficiency (SCN1), cyclic neutropenia                               |
| EPG5    | Vici syndrome due to EPG5 deficiency                                         |
| FADD    | FADD deficiency                                                              |
| FAS     | ALPS-FAS                                                                     |
| FASLG   | ALPS-FASLG                                                                   |
| FERMT3  | Leukocyte adhesion deficiency type 3                                         |
| FOXN1   | Winged helix deficiency (nude) AAB: syndromic SCID                           |

|         |                                                                      |
|---------|----------------------------------------------------------------------|
| FOXP3   | IPEX, immune dysregulation, polyendocrinopathy, enteropathy X-linked |
| FPR1    | Localized juvenile periodontitis                                     |
| G6PC3   | G6PC3 deficiency (SCN4)                                              |
| GATA2   | GATA2 deficiency                                                     |
| GFI1    | GFI 1 deficiency (SCN2)                                              |
| HAX1    | Kostmann Disease (SCN3)                                              |
| ICOS    | ICOS deficiency                                                      |
| IFIH1   | Aicardi-Goutieres syndrome 7                                         |
| IFNGR1  | IFN- $\gamma$ receptor 1 deficiency                                  |
| IFNGR2  | IFN- $\gamma$ receptor 2 deficiency                                  |
| IGLL1   | $\lambda$ 5 deficiency                                               |
| IKBKB   | IKBKB deficiency                                                     |
| IL10    | IL-10 deficiency                                                     |
| IL10RA  | IL-10R $\alpha$ deficiency                                           |
| IL10RB  | IL-10R $\beta$ deficiency                                            |
| IL12B   | IL-12p40 deficiency                                                  |
| IL12RB1 | IL-12 and IL-23 receptor $\beta$ 1 chain deficiency                  |
| IL17F   | IL-17F deficiency                                                    |
| IL17RA  | IL-17RA deficiency                                                   |
| IL17RC  | IL-17RC deficiency                                                   |
| IL1RN   | IL1RN                                                                |
| IL21    | IL-21 deficiency                                                     |
| IL21R   | IL-21R deficiency                                                    |
| IL2RA   | CD25 deficiency                                                      |
| IL2RG   | $\gamma$ c deficiency                                                |
| IL36RN  | DITRA – Deficiency of IL-36 receptor antagonist                      |
| IL7R    | IL7R $\alpha$ deficiency                                             |
| IRAK4   | IRAK-4 deficiency                                                    |

|         |                                                                                                      |
|---------|------------------------------------------------------------------------------------------------------|
| IRF7    | IRF7 deficiency                                                                                      |
| IRF8    | IRF8 deficiency                                                                                      |
| ISG15   | ISG15 deficiency                                                                                     |
| ITCH    | ITCH deficiency                                                                                      |
| ITGB2   | Leukocyte adhesion deficiency type 1                                                                 |
| ITK     | lymphoproliferative syndrome type 1 (LPFS1)                                                          |
| JAGN1   | JAGN1 deficiency                                                                                     |
| JAK3    | JAK3 deficiency                                                                                      |
| LAMTOR2 | P14/LAMTOR2 deficiency                                                                               |
| LCK     | LCK deficiency                                                                                       |
| LIG4    | DNA ligase IV deficiency                                                                             |
| LPIN2   | Chronic recurrent multifocal osteomyelitis and congenital dyserythropoietic anemia (Majeed syndrome) |
| LRBA    | LRBA deficiency                                                                                      |
| LYST    | Chediak-Higashi syndrome                                                                             |
| MAGT1   | X-linked immunodeficiency with magnesium defect, Epstein-Barr virus infection, and neoplasia (XMEN)  |
| MALT1   | MALT1 deficiency                                                                                     |
| MAP3K14 | NIK deficiency                                                                                       |
| MEFV    | Familial Mediterranean Fever                                                                         |
| MOGS    | MOGS deficiency                                                                                      |
| MVK     | Mevalonate kinase deficiency                                                                         |
| MYD88   | MyD88 deficiency                                                                                     |
| NBN     | Nijmegen breakage syndrome                                                                           |
| NCF2    | Autosomal recessive CGD                                                                              |
| NCF4    | Autosomal recessive CGD                                                                              |
| NFAT5   | NFAT5 haploinsufficiency                                                                             |
| NFKB2   | NFKB2 deficiency                                                                                     |

|         |                                                                                                                                                                                                                                 |
|---------|---------------------------------------------------------------------------------------------------------------------------------------------------------------------------------------------------------------------------------|
| NFKBIA  | Anhidrotic ectodermal dysplasia with T-cell immunodeficiency (EDA-ID), IKBA gain                                                                                                                                                |
| NHEJ1   | Cernunnos/XLF deficiency                                                                                                                                                                                                        |
| NHP2    | AR-DKC due to nucleolar protein family A member 2 (NHP2) deficiency                                                                                                                                                             |
| NLRC4   | NLRC4-MAS (macrophage activating syndrome), Familial cold autoinflammatory syndrome 4                                                                                                                                           |
| NLRP12  | Familial cold autoinflammatory syndrome 2                                                                                                                                                                                       |
| NLRP3   | Muckle-Wells syndrome, Familial cold autoinflammatory syndrome 1, Neonatal onset multisystem inflammatory disease (NOMID) or chronic infantile neurologic cutaneous and articular syndrome (CINCA)                              |
| NOD2    | Blau syndrome                                                                                                                                                                                                                   |
| NOP10   | AR-DKC due to nucleolar protein family A member 3 (NHP3) or NOP10 deficiency                                                                                                                                                    |
| ORAI1   | ORAI-I deficiency                                                                                                                                                                                                               |
| PARN    | AR-DKC due to PARN deficiency                                                                                                                                                                                                   |
| PGM3    | PGM3 deficiency                                                                                                                                                                                                                 |
| PIK3CD  | Activated PI3K- $\delta$                                                                                                                                                                                                        |
| PIK3R1  | PI3KR1 deficiency, PI3KR1 loss of function                                                                                                                                                                                      |
| PLCG2   | PLAID (PLC $\gamma$ 2 associated antibody deficiency and immune dysregulation), Familial cold autoinflammatory syndrome 3, APLAID (autoinflammation and PLC $\gamma$ 2 associated antibody deficiency and immune dysregulation) |
| PMM2    | PMM2-congenital disorder of glycosylation (CDG-Ia)                                                                                                                                                                              |
| PNP     | Purine nucleoside phosphorylase (PNP) deficiency                                                                                                                                                                                |
| POLE    | FILS syndrome                                                                                                                                                                                                                   |
| PRF1    | Perforin deficiency (FHL2)                                                                                                                                                                                                      |
| PRKCD   | PRKC delta deficiency                                                                                                                                                                                                           |
| PRKDC   | DNA PKcs deficiency                                                                                                                                                                                                             |
| PSMB8   | CANDLE (chronic atypical neutrophilic dermatitis with lipodystrophy)                                                                                                                                                            |
| PSTPIP1 | Pyogenic sterile arthritis, pyoderma gangrenosum, acne (PAPA) syndrome                                                                                                                                                          |
| PTPRC   | CD45 deficiency                                                                                                                                                                                                                 |
| RAB27A  | Griscelli syndrome, type 2                                                                                                                                                                                                      |
| RAC2    | Rac 2 deficiency                                                                                                                                                                                                                |
| RAG1    | RAG 1 deficiency                                                                                                                                                                                                                |

|          |                                                                                   |
|----------|-----------------------------------------------------------------------------------|
| RAG2     | RAG 2 deficiency                                                                  |
| RBCK1    | Polyglucosan body myopathy, early-onset, with or without immunodeficiency (PBMEI) |
| RFX5     | MHC class II deficiency group C                                                   |
| RFXANK   | MHC class II deficiency group B                                                   |
| RFXAP    | MHC class II deficiency group D                                                   |
| RHOH     | RhoH deficiency                                                                   |
| RMRP     | Cartilage hair hypoplasia                                                         |
| RNASEH2A | RNASEH2A deficiency, Aicardi-Goutieres syndrome 4                                 |
| RNASEH2B | RNASEH2B deficiency, Aicardi-Goutieres syndrome 2                                 |
| RNASEH2C | RNASEH2C deficiency, Aicardi-Goutieres syndrome 3                                 |
| RORC     | RORc deficiency                                                                   |
| RTEL1    | AR-DKC due to regulator of telomere elongation (RTEL1) deficiency                 |
| SAMHD1   | SAMHD1 deficiency, Aicardi-Goutieres syndrome 5                                   |
| SEMA3E   | CHARGE syndrome                                                                   |
| SH2D1A   | SH2D1A deficiency (XLP1)                                                          |
| SH3BP2   | Cherubism                                                                         |
| SLC29A3  | SLC29A3 mutation                                                                  |
| SLC35C1  | Leukocyte adhesion deficiency type 2                                              |
| SLC37A4  | Glycogen storage disease type 1b                                                  |
| SLC7A7   | lysinuric protein intolerance                                                     |
| SMARCAL1 | Schimke Immunoosseous Dysplasia                                                   |
| SP110    | Hepatic veno-occlusive disease with immunodeficiency                              |
| SPINK5   | Comel-Netherton syndrome                                                          |
| STAT1    | STAT1 deficiency                                                                  |
| STAT2    | STAT2 deficiency                                                                  |
| STAT3    | AD-HIES (Job or Buckley Syndrome), STAT3 GOF mutations                            |
| STAT5B   | STAT5b deficiency                                                                 |



|           |                                                   |
|-----------|---------------------------------------------------|
| STIM1     | STIM1 deficiency                                  |
| STK4      | MST1 deficiency                                   |
| STX11     | Syntaxin 11 deficiency, (FHL4)                    |
| STXBP2    | STXBP2 / Munc18-2 deficiency (FHL5)               |
| TAP1      | MHC class I deficiency                            |
| TAP2      | MHC class I deficiency                            |
| TAPBP     | MHC class I deficiency                            |
| TBX1      | DiGeorge syndrome                                 |
| TAZ       | Barth syndrome                                    |
| TBX1      | DiGeorge syndrome                                 |
| TCN2      | Transcobalamin 2 deficiency                       |
| TERC      | AD-DKC due to TERC deficiency                     |
| TERT      | AD-DKC due to TERT deficiency                     |
| TICAM1    | TRIF deficiency                                   |
| TINF2     | AD-DKC due to TINF2 deficiency                    |
| TLR3      | TLR3 deficiency                                   |
| TMC6      | EVER1 deficiency                                  |
| TMC8      | EVER2 deficiency                                  |
| TMEM173   | STING-associated vasculopathy, infantile onset    |
| TNFRSF13B | TACI deficiency                                   |
| TNFRSF13C | BAFF receptor deficiency                          |
| TNFRSF1A  | TNF receptor-associated periodic syndrome (TRAPS) |
| TNFRSF4   | OX40 deficiency                                   |
| TNFSF12   | TWEAK deficiency                                  |
| TPP2      | Tripeptidyl-Peptidase II Deficiency               |
| TRAF3     | TRAF3 deficiency                                  |
| TRAF3IP2  | ACT1 deficiency                                   |
| TREX1     | TREX1 deficiency, Aicardi-Goutieres syndrome      |

|         |                                                                           |
|---------|---------------------------------------------------------------------------|
| TRNT1   | TRNT1 deficiency                                                          |
| TTC7A   | Immunodeficiency with multiple intestinal atresias                        |
| TYK2    | Tyk2 deficiency                                                           |
| UNC13D  | UNC13D / Munc13-4 deficiency (FHL3)                                       |
| UNC93B1 | UNC93B1 deficiency                                                        |
| UNG     | UNG deficiency                                                            |
| VPS13B  | Cohen syndrome                                                            |
| VPS45   | VPS45 deficiency (SCN5)                                                   |
| WAS     | Wiskott-Aldrich syndrome, X-linked neutropenia/ myelodysplasia            |
| WIPF1   | WIP deficiency                                                            |
| XIAP    | XIAP deficiency (XLP2)                                                    |
| ZAP70   | ZAP-70 deficiency                                                         |
| ZBTB24  | Immunodeficiency with centromeric instability and facial anomalies (ICF2) |

**Supplementary Table 3. Genes on the 407 gene PI panel and their associated conditions**

| Gene   | Condition(s)                                                                                                                |
|--------|-----------------------------------------------------------------------------------------------------------------------------|
| ACD    | autosomal dominant and autosomal recessive dyskeratosis congenita (DC) spectrum disorders                                   |
| ACP5   | autosomal recessive spondyloenchondrodysplasia with immune dysregulation (SED)                                              |
| ACTB   | autosomal dominant Baraitser-Winter cerebrofrontofacial (BWCF) syndrome                                                     |
| ADA    | autosomal recessive severe combined immunodeficiency due to adenosine deaminase deficiency                                  |
| ADA2   | autosomal recessive deficiency of adenosine deaminase 2 (DADA2)                                                             |
| ADAM17 | autosomal recessive inflammatory skin and bowel disease (ISBD)                                                              |
| ADAR   | autosomal dominant dyschromatosis symmetrica hereditaria (DSH)                                                              |
| AICDA  | autosomal recessive, and rarely, autosomal dominant, hyper-IgM syndrome (HIGM)                                              |
| AIRE   | autosomal recessive and autosomal dominant autoimmune polyendocrinopathy with candidiasis and ectodermal dysplasia (APECED) |
| AK2    | autosomal recessive reticular dysgenesis                                                                                    |
| ALG6   | autosomal recessive ALG6-congenital disorder of glycosylation (CDG-Ic)                                                      |
| ANGPT1 | autosomal dominant hereditary angioedema                                                                                    |

|          |                                                                                                                                          |
|----------|------------------------------------------------------------------------------------------------------------------------------------------|
| ANKZF1   | infantile onset inflammatory bowel disease                                                                                               |
| AP3B1    | autosomal recessive Hermansky-Pudlak syndrome (HPS) type 2                                                                               |
| AP3D1    | autosomal recessive Hermansky-Pudlak syndrome                                                                                            |
| ARHGEF1  | autosomal recessive ARHGEF1-related primary antibody deficiency                                                                          |
| ARPC1B   | autosomal recessive ARPC1B deficiency                                                                                                    |
| ASAH1    | autosomal recessive acid ceramidase deficiency, also known as Farber lipogranulomatosis or Farber disease                                |
| ATM      | autosomal recessive ataxia-telangiectasia (A-T) and autosomal dominant predisposition to breast, pancreatic and possibly prostate cancer |
| ATP6AP1  | X-linked recessive ATP6AP1 deficiency                                                                                                    |
| B2M      | autosomal recessive hereditary major histocompatibility complex (MHC) class I deficiency                                                 |
| BACH2    | autosomal dominant BACH2 deficiency                                                                                                      |
| BCL10    | combined immunodeficiency                                                                                                                |
| BCL11B   | autosomal dominant BCL11B deficiency                                                                                                     |
| BLM      | autosomal recessive Bloom syndrome                                                                                                       |
| BLNK     | autosomal recessive BLNK deficiency                                                                                                      |
| BLOC1S3  | autosomal recessive Hermansky-Pudlak syndrome                                                                                            |
| BLOC1S6  | autosomal recessive Hermansky-Pudlak syndrome (HPS) type 9                                                                               |
| BTK      | X-linked recessive agammaglobulinemia (XLA)                                                                                              |
| C17orf62 | autosomal recessive chronic granulomatous disease                                                                                        |
| C1QA     | autosomal recessive C1q deficiency                                                                                                       |
| C1QB     | autosomal recessive C1q deficiency                                                                                                       |
| C1QC     | autosomal recessive C1q deficiency                                                                                                       |
| C1S      | autosomal recessive C1s deficiency                                                                                                       |
| C2       | autosomal recessive complement component 2 (C2) deficiency                                                                               |
| C3       | autosomal recessive C3 deficiency                                                                                                        |
| C5       | autosomal recessive complement component 5 (C5) deficiency                                                                               |
| C6       | autosomal recessive complement component 6 (C6) deficiency                                                                               |
| C7       | autosomal recessive complement component 7 (C7) deficiency                                                                               |
| C8A      | autosomal recessive C8 alpha deficiency                                                                                                  |
| C8B      | autosomal recessive C8 beta deficiency                                                                                                   |
| C9       | autosomal recessive complement component 9 (C9) deficiency                                                                               |

|         |                                                                                                                |
|---------|----------------------------------------------------------------------------------------------------------------|
| CARD11  | autosomal recessive combined immunodeficiency due to CARD11 deficiency                                         |
| CARD14  | autosomal dominant CAMPS (CARD14-mediated psoriasis)                                                           |
| CARD8   | autosomal dominant Crohn's disease                                                                             |
| CARD9   | autosomal recessive CARD9 deficiency                                                                           |
| CARMIL2 | autosomal recessive RLTPR (CARMIL2) deficiency                                                                 |
| CASP10  | autosomal dominant and autosomal recessive autoimmune lymphoproliferative syndrome (ALPS-CASP10)               |
| CASP8   | autosomal recessive caspase-8 deficiency state (CEDS)                                                          |
| CBL     | autosomal dominant Noonan-like syndrome with or without juvenile myelomonocytic leukemia                       |
| CCBE1   | autosomal recessive Hennekam lymphangiectasia-lymphedema syndrome                                              |
| CD19    | autosomal recessive common variable immune deficiency (CVID) due to CD19 deficiency                            |
| CD247   | autosomal recessive severe combined immunodeficiency due to CD3-zeta deficiency                                |
| CD27    | autosomal recessive CD27 deficiency                                                                            |
| CD3D    | autosomal recessive severe combined immunodeficiency due to CD3-delta deficiency                               |
| CD3E    | autosomal recessive severe combined immunodeficiency due to CD3-epsilon deficiency                             |
| CD3G    | autosomal recessive combined immunodeficiency due to CD3-gamma deficiency                                      |
| CD40    | autosomal recessive hyper IgM syndrome (HIGM)                                                                  |
| CD40LG  | X-linked hyper-IgM syndrome (HIGM)                                                                             |
| CD46    | autosomal dominant atypical hemolytic uremic syndrome (aHUS)                                                   |
| CD55    | autosomal recessive complement hyperactivation, angioathic thrombosis, and protein-losing enteropathy syndrome |
| CD59    | autosomal recessive CD59-mediated hemolytic anemia, with or without immune-mediated polyneuropathy (HACD59)    |
| CD79A   | autosomal recessive agammaglobulinemia due to Ig $\alpha$ deficiency                                           |
| CD79B   | autosomal recessive agammaglobulinemia due to Ig $\beta$ deficiency                                            |
| CD81    | autosomal recessive common variable immunodeficiency due to CD81 deficiency                                    |
| CD8A    | autosomal recessive familial CD8 deficiency                                                                    |
| CDC42   | autosomal dominant Takenouchi-Kosaki syndrome                                                                  |
| CDCA7   | autosomal recessive immunodeficiency-centromeric instability-facial anomalies (ICF) syndrome                   |
| CEBPE   | autosomal recessive neutrophil-specific granule deficiency                                                     |
| CFB     | autosomal dominant atypical hemolytic uremic syndrome                                                          |

|         |                                                                                                                                     |
|---------|-------------------------------------------------------------------------------------------------------------------------------------|
| CFD     | autosomal recessive complement factor D deficiency (CFDD)                                                                           |
| CFH     | autosomal dominant atypical hemolytic uremic syndrome                                                                               |
| CFI     | autosomal recessive complement factor I deficiency                                                                                  |
| CFP     | X-linked recessive properdin deficiency                                                                                             |
| CHD7    | autosomal dominant CHARGE syndrome                                                                                                  |
| CIB1    | autosomal recessive epidermolytic hyperkeratosis due to CIB1 deficiency                                                             |
| CIITA   | autosomal recessive major histocompatibility complex (MHC) class II deficiency                                                      |
| CLCN7   | autosomal recessive osteopetrosis                                                                                                   |
| CLPB    | autosomal recessive 3-methylglutaconic aciduria with cataracts, neurologic involvement, and neutropenia (MEGCANN)                   |
| COL7A1  | autosomal dominant dystrophic epidermolysis bullosa (DDEB)                                                                          |
| COPA    | autosomal dominant autoimmune interstitial lung, joint, and kidney disease (AILJK)                                                  |
| CORO1A  | autosomal recessive severe combined immunodeficiency due to coronin-1A deficiency                                                   |
| CR2     | autosomal recessive hypogammaglobulinemia due to CD21 deficiency                                                                    |
| CSF2RA  | X-linked primary pulmonary alveolar proteinosis (PAP)                                                                               |
| CSF2RB  | autosomal recessive pulmonary alveolar proteinosis (PAP)                                                                            |
| CSF3R   | autosomal dominant hereditary neutrophilia                                                                                          |
| CTC1    | autosomal recessive cerebroretinal microangiopathy with calcifications and cysts type 1 (CRMCC1), also known as Coats plus syndrome |
| CTLA4   | autosomal dominant CTLA4 haploinsufficiency                                                                                         |
| CTPS1   | autosomal recessive combined immunodeficiency due to CTPS1 deficiency                                                               |
| CTSC    | autosomal recessive Papillon-Lefevre syndrome                                                                                       |
| CXCR2   | autosomal recessive myelokathexis                                                                                                   |
| CXCR4   | autosomal dominant warts, hypogammaglobulinemia, infections, and myelokathexis syndrome (WHIMS)                                     |
| CYBA    | autosomal recessive chronic granulomatous disease (CGD)                                                                             |
| CYBB    | X-linked recessive chronic granulomatous disease (CGD)                                                                              |
| CYP27A1 | autosomal recessive cerebrotendinous xanthomatosis (CTX)                                                                            |
| DCLRE1C | autosomal recessive severe combined immunodeficiency due to DCLRE1C (Artemis) deficiency                                            |
| DDX58   | autosomal dominant Singleton-Merten syndrome                                                                                        |
| DEF6    | DEF6 deficiency                                                                                                                     |
| DGAT1   | autosomal recessive congenital chronic diarrhea                                                                                     |
| DIAPH1  | autosomal dominant deafness with or without thrombocytopenia (DFNA1)                                                                |

|          |                                                                                                     |
|----------|-----------------------------------------------------------------------------------------------------|
| DKC1     | X-linked dyskeratosis congenita spectrum disorders (DC)                                             |
| DNAJC21  | autosomal recessive Shwachman-Diamond syndrome due to DNAJC21 deficiency                            |
| DNASE1L3 | autosomal recessive systemic lupus erythematosus                                                    |
| DNASE2   | autosomal recessive DNase II deficiency                                                             |
| DNMT3B   | autosomal recessive immunodeficiency, centromeric instability, and facial anomalies (ICF) syndrome  |
| DOCK2    | autosomal recessive combined immunodeficiency (CID) due to DOCK2 deficiency                         |
| DOCK8    | autosomal recessive DOCK8 deficiency                                                                |
| DSG1     | autosomal dominant keratosis palmoplantaris striata                                                 |
| DTNBP1   | autosomal recessive Hermansky-Pudlak syndrome                                                       |
| DUOX2    | autosomal dominant partial iodide organification defect (PIOD) and autosomal recessive thyroid      |
| EFL1     | autosomal recessive Shwachman-Diamond syndrome                                                      |
| EIF2AK3  | autosomal recessive Wolcott-Rallison syndrome (WRS)                                                 |
| ELANE    | autosomal dominant ELANE-related neutropenia, including both congenital                             |
| EPG5     | autosomal recessive Vici syndrome                                                                   |
| ERBIN    | autosomal dominant elevated IgE, eosinophilic esophagitis, joint hypermobility & vascular anomalies |
| ERCC2    | autosomal recessive photosensitive trichothiodystrophy (TTD)                                        |
| ERCC3    | autosomal recessive xeroderma pigmentosum/Cockayne syndrome                                         |
| ERCC6L2  | autosomal recessive ERCC6L2 (Hebo) deficiency                                                       |
| EXTL3    | autosomal recessive EXTL3 deficiency                                                                |
| FADD     | autosomal recessive FADD deficiency                                                                 |
| FANCA    | autosomal recessive Fanconi anemia type A (FA-A)                                                    |
| FANCB    | X-linked Fanconi anemia type B (FA-B)                                                               |
| FANCE    | autosomal recessive Fanconi anemia, type E (FA-E)                                                   |
| FANCF    | autosomal recessive Fanconi anemia, type F (FA-F)                                                   |
| FANCI    | autosomal recessive Fanconi anemia, type I (FA-I)                                                   |
| FANCL    | autosomal recessive Fanconi anemia, type L (FA-L)                                                   |
| FAS      | autosomal dominant autoimmune lymphoproliferative syndrome (ALPS-FAS)                               |
| FASLG    | autosomal recessive autoimmune lymphoproliferative syndrome (ALPS-FASLG)                            |
| FAT4     | autosomal recessive Hennekam lymphangiectasia-lymphedema syndrome                                   |
| FCHO1    | autosomal recessive combined immunodeficiency due to FCHO1 deficiency                               |

|        |                                                                                              |
|--------|----------------------------------------------------------------------------------------------|
| FERMT1 | autosomal recessive Kindler syndrome                                                         |
| FERMT3 | autosomal recessive leukocyte adhesion deficiency, type 3 (LAD3)                             |
| FOXI3  | FOXI3 deficiency                                                                             |
| FOXN1  | autosomal recessive severe combined immunodeficiency due to FOXN1 deficiency                 |
| FOXP3  | X-linked recessive immunodysregulation, polyendocrinopathy, and enteropathy (IPEX syndrome)  |
| FPR1   | autosomal dominant periodontitis                                                             |
| G6PC   | autosomal recessive glycogen storage disease type Ia (GSDIa)                                 |
| G6PC3  | autosomal recessive severe congenital neutropenia                                            |
| G6PD   | X-linked glucose-6-phosphate dehydrogenase deficiency                                        |
| GATA2  | autosomal dominant GATA2 deficiency                                                          |
| GFI1   | autosomal dominant severe congenital neutropenia due to GFI1 deficiency                      |
| GINS1  | autosomal recessive immunodeficiency due to GINS1 deficiency                                 |
| GTF2E2 | autosomal recessive trichothiodystrophy                                                      |
| GTF2H5 | autosomal recessive trichothiodystrophy (TTD)                                                |
| GUCY2C | autosomal dominant congenital sodium diarrhea                                                |
| HAX1   | autosomal recessive severe congenital neutropenia due to HAX1 deficiency                     |
| HELLS  | autosomal recessive immunodeficiency-centromeric instability-facial anomalies (ICF) syndrome |
| HMOX1  | autosomal recessive heme oxygenase 1 deficiency (HMOX1D)                                     |
| HPS1   | autosomal recessive Hermansky-Pudlak syndrome 1 (HPS1)                                       |
| HPS3   | autosomal recessive Hermansky-Pudlak syndrome 3 (HPS3)                                       |
| HPS4   | autosomal recessive Hermansky-Pudlak syndrome                                                |
| HPS5   | autosomal recessive Hermansky-Pudlak syndrome                                                |
| HPS6   | autosomal recessive Hermansky-Pudlak syndrome                                                |
| HTRA2  | autosomal recessive 3-methylglutaconic aciduria                                              |
| HYOU1  | autosomal recessive HYOU1-related immunodeficiency and hypoglycemia                          |
| ICOS   | autosomal recessive common variable immunodeficiency (CVID) due to ICOS deficiency           |
| ICOSLG | autosomal recessive combined immunodeficiency                                                |
| IFIH1  | autosomal dominant Aicardi-Goutieres syndrome (AGS)                                          |
| IFNAR1 | susceptibility to infections due to IFNAR1 deficiency and Evans syndrome                     |
| IFNAR2 | autosomal recessive IFNAR2 deficiency                                                        |

## Supplementary Material

|         |                                                                                                                             |
|---------|-----------------------------------------------------------------------------------------------------------------------------|
| IFNGR1  | autosomal recessive Mendelian susceptibility to mycobacterial disease (MSMD) due to interferon-gamma receptor 1 deficiency. |
| IFNGR2  | autosomal recessive Mendelian susceptibility to mycobacterial disease (MSMD)                                                |
| IGLL1   | autosomal recessive agammaglobulinemia                                                                                      |
| IKBKB   | autosomal dominant anhidrotic ectodermal dysplasia with immunodeficiency (EDA-ID) due to IKBKB gain-of-function             |
| IL10    | autosomal recessive infantile onset inflammatory bowel disease (IBD) due to IL-10 deficiency                                |
| IL10RA  | autosomal recessive early onset inflammatory bowel disease (IBD), due to interleukin 10 receptor alpha deficiency           |
| IL10RB  | autosomal recessive inflammatory bowel disease (IBD) due to interleukin 10 receptor beta deficiency                         |
| IL12B   | autosomal recessive Mendelian susceptibility to mycobacterial disease due to interleukin 12 deficiency                      |
| IL12RB1 | autosomal recessive Mendelian susceptibility to mycobacterial disease (MSMD)                                                |
| IL12RB2 | autosomal recessive IL12RB2 deficiency                                                                                      |
| IL17F   | autosomal dominant chronic mucocutaneous candidiasis                                                                        |
| IL17RA  | autosomal recessive chronic mucocutaneous candidiasis (CMC) due to IL17RA deficiency                                        |
| IL17RC  | autosomal recessive chronic mucocutaneous candidiasis                                                                       |
| IL1RN   | autosomal recessive interleukin 1 receptor antagonist deficiency (DIRA)                                                     |
| IL21    | autosomal recessive early onset inflammatory bowel disease and common variable immunodeficiency (CVID)                      |
| IL21R   | autosomal recessive combined immunodeficiency due to interleukin 21 receptor deficiency                                     |
| IL23R   | autosomal recessive IL23R deficiency                                                                                        |
| IL2RA   | autosomal recessive CD25 deficiency                                                                                         |
| IL2RB   | autosomal recessive immunodeficiency with lymphoproliferation and autoimmunity due to CD122 deficiency                      |
| IL2RG   | X-linked recessive severe combined immunodeficiency                                                                         |
| IL36RN  | autosomal recessive deficiency of interleukin-36 receptor antagonist (DITRA)                                                |
| IL6R    | IL6 receptor deficiency                                                                                                     |
| IL6ST   | autosomal dominant hyper IgE syndrome (HIES) and autosomal recessive Stuve-Wiedemann syndrome (SWS)                         |
| IL7R    | autosomal recessive severe combined immunodeficiency due to IL7R-alpha deficiency                                           |
| IRAK4   | autosomal recessive IRAK-4 deficiency                                                                                       |
| IRF2BP2 | autosomal dominant common variable immunodeficiency due to IRF2BP2 deficiency                                               |



|         |                                                                                                                                                  |
|---------|--------------------------------------------------------------------------------------------------------------------------------------------------|
| IRF4    | autosomal recessive IRF4 deficiency                                                                                                              |
| IRF7    | autosomal recessive severe influenza disease                                                                                                     |
| IRF8    | autosomal dominant susceptibility to mycobacterial disease (MSMD) and autosomal recessive natural killer (NK) cell deficiency                    |
| IRF9    | autosomal recessive IRF9 deficiency                                                                                                              |
| ISG15   | autosomal recessive Mendelian susceptibility to mycobacterial disease (MSMD)                                                                     |
| ITCH    | autosomal recessive ITCH deficiency                                                                                                              |
| ITGAM   | systemic lupus erythematosus                                                                                                                     |
| ITGB2   | autosomal recessive leukocyte adhesion deficiency type 1 (LAD1)                                                                                  |
| ITK     | autosomal recessive ITK deficiency                                                                                                               |
| JAGN1   | autosomal recessive severe congenital neutropenia due to JAGN1 deficiency                                                                        |
| JAK1    | autosomal dominant immune dysregulation and hypereosinophilic syndrome and autosomal recessive Mendelian susceptibility to mycobacterial disease |
| JAK3    | autosomal recessive severe combined immunodeficiency due to JAK3 deficiency                                                                      |
| KDM6A   | X-linked dominant Kabuki syndrome                                                                                                                |
| KMT2A   | autosomal dominant Wiedemann-Steiner syndrome (WDSTS)                                                                                            |
| KMT2D   | autosomal dominant Kabuki syndrome                                                                                                               |
| LAMTOR2 | autosomal recessive LAMTOR2 deficiency                                                                                                           |
| LAT     | autosomal recessive combined immunodeficiency due to LAT deficiency                                                                              |
| LCK     | autosomal recessive combined immunodeficiency due to LCK deficiency                                                                              |
| LCT     | autosomal recessive congenital lactase deficiency                                                                                                |
| LIG1    | autosomal recessive ligase I deficiency                                                                                                          |
| LIG4    | autosomal recessive LIG4 syndrome                                                                                                                |
| LIPA    | autosomal recessive lysosomal acid lipase (LAL) deficiency                                                                                       |
| LPIN2   | autosomal recessive Majeed syndrome                                                                                                              |
| LRBA    | autosomal recessive LRBA deficiency                                                                                                              |
| LRRC8A  | autosomal dominant agammaglobulinemia due to LRRC8A deficiency                                                                                   |
| LYN     | autoinflammatory disease                                                                                                                         |
| LYST    | autosomal recessive Chediak-Higashi syndrome (CHS)                                                                                               |
| MAGT1   | X-linked recessive immunodeficiency with magnesium defect, Epstein-Barr virus infection, and neoplasia (XMEN)                                    |
| MALT1   | autosomal recessive combined immunodeficiency due to MALT1 deficiency                                                                            |

|         |                                                                                                                  |
|---------|------------------------------------------------------------------------------------------------------------------|
| MAP3K14 | autosomal recessive combined immunodeficiency due to NF- $\kappa$ B-inducing kinase (NIK) deficiency             |
| MCM4    | autosomal recessive MCM4 deficiency                                                                              |
| MEFV    | autosomal recessive familial Mediterranean fever (FMF)                                                           |
| MKL1    | autosomal recessive MKL1 deficiency                                                                              |
| MOGS    | autosomal recessive MOGS-congenital disorder of glycosylation (CDG-IIb)                                          |
| MPLKIP  | autosomal recessive non-photosensitive trichothiodystrophy                                                       |
| MS4A1   | autosomal recessive CD20 deficiency                                                                              |
| MSN     | X-linked moesin deficiency                                                                                       |
| MTHFD1  | autosomal recessive methylenetetrahydrofolate dehydrogenase 1 deficiency                                         |
| MVK     | autosomal recessive mevalonate kinase deficiency                                                                 |
| MYD88   | autosomal recessive MyD88 deficiency                                                                             |
| MYO5B   | autosomal recessive microvillus inclusion disease (MVID)                                                         |
| MYSM1   | autosomal recessive MYSM1 deficiency                                                                             |
| NBAS    | autosomal recessive infantile liver failure                                                                      |
| NBN     | autosomal recessive Nijmegen breakage syndrome (NBS)                                                             |
| NCF2    | autosomal recessive chronic granulomatous disease (CGD)                                                          |
| NCF4    | autosomal recessive chronic granulomatous disease (CGD)                                                          |
| NCSTN   | autosomal dominant hidradenitis suppurativa (HS) due to NCSTN deficiency                                         |
| NEUROG3 | autosomal recessive congenital malabsorptive diarrhea                                                            |
| NFAT5   | autosomal dominant immunodeficiency and autoimmune enterocolopathy                                               |
| NFE2L2  | autosomal dominant immunodeficiency, developmental delay, and hypohomocysteinemia due to NFE2L2 gain-of-function |
| NFKB1   | autosomal dominant common variable immunodeficiency due to NFKB1 deficiency                                      |
| NFKB2   | autosomal dominant deficient anterior pituitary with variable immune deficiency (DAVID) syndrome                 |
| NFKBIA  | autosomal dominant anhidrotic ectodermal dysplasia with T-cell immunodeficiency (EDA-ID)                         |
| NHEJ1   | autosomal recessive severe combined immunodeficiency due to Cernunnos/XLF deficiency                             |
| NHP2    | autosomal recessive NHP2-related dyskeratosis congenita (DC) spectrum disorders                                  |
| NLRC4   | autosomal dominant familial cold autoinflammatory syndrome (FCAS)                                                |
| NLRP1   | autosomal dominant NLRP1 gain of function (GOF) syndrome                                                         |
| NLRP12  | autosomal dominant familial cold autoinflammatory syndrome (FCAS)                                                |

|        |                                                                                                                            |
|--------|----------------------------------------------------------------------------------------------------------------------------|
| NLRP3  | autosomal dominant cryopyrin-associated periodic syndrome (CAPS)                                                           |
| NOD2   | autosomal dominant Blau syndrome                                                                                           |
| NOP10  | NOP10-related dyskeratosis congenita (DC) spectrum disorders                                                               |
| NSMCE3 | autosomal recessive NSMCE3 deficiency                                                                                      |
| OAS1   | autosomal dominant pulmonary alveolar proteinosis with hypogammaglobulinemia                                               |
| ORAI1  | autosomal dominant tubular aggregate myopathy 2 (TAM2)                                                                     |
| OSTM1  | autosomal recessive OSTM1 deficiency associated osteopetrosis                                                              |
| OTULIN | autosomal recessive otulipenia/ORAS                                                                                        |
| PARN   | autosomal recessive dyskeratosis congenita                                                                                 |
| PAX1   | autosomal recessive otofaciocervical syndrome                                                                              |
| PEPD   | autosomal recessive prolidase deficiency (PD)                                                                              |
| PGM3   | autosomal recessive PGM3-congenital disorder of glycosylation (CDG)                                                        |
| PIK3CD | autosomal dominant activated phosphoinositide 3-kinase $\delta$ (PI3K-delta) syndrome                                      |
| PIK3R1 | autosomal dominant SHORT syndrome                                                                                          |
| PLCG2  | autosomal dominant familial cold autoinflammatory syndrome                                                                 |
| PMM2   | autosomal recessive PMM2-congenital disorder of glycosylation (CDG-Ia)                                                     |
| PNP    | autosomal recessive purine nucleoside phosphorylase deficiency                                                             |
| POLA1  | X-linked pigmentary reticulate disorder                                                                                    |
| POLD1  | autosomal dominant predisposition to colonic adenomatous polyps and colon cancer                                           |
| POLE   | an autosomal dominant predisposition to colonic adenomatous polyps and colon cancer                                        |
| POLE2  | combined immunodeficiency                                                                                                  |
| POLR3A | autosomal recessive hypomyelinating leukodystrophy 7                                                                       |
| POMP   | autosomal dominant proteasome-associated autoinflammatory syndrome type 2 (PRAAS2)                                         |
| PRF1   | autosomal recessive familial hemophagocytic lymphohistiocytosis type 2 (FHL2)                                              |
| PRKCD  | autosomal recessive PRKC delta deficiency                                                                                  |
| PRKDC  | autosomal recessive severe combined immunodeficiency due to DNA PKcs deficiency                                            |
| PSENEN | autosomal dominant hidradenitis suppurativa (HS) due to PSENEN deficiency                                                  |
| PSMA3  | proteasome-associated autoinflammatory syndrome-1                                                                          |
| PSMB4  | autosomal recessive chronic atypical neutrophilic dermatosis with lipodystrophy and elevated temperature (CANDLE) syndrome |
| PSMB8  | autosomal recessive proteasome-associated autoinflammatory syndrome (PRAAS)                                                |

|          |                                                                                                                            |
|----------|----------------------------------------------------------------------------------------------------------------------------|
| PSMG2    | autosomal recessive chronic atypical neutrophilic dermatosis with lipodystrophy and elevated temperature (CANDLE) syndrome |
| PSTPIP1  | autosomal dominant pyogenic sterile arthritis, pyoderma gangrenosum, and acne (PAPA) syndrome                              |
| PTPRC    | autosomal recessive severe combined immunodeficiency due to CD45 deficiency                                                |
| RAB27A   | autosomal recessive Griscelli syndrome type 2 (GS2)                                                                        |
| RAC2     | autosomal dominant neutrophil immunodeficiency syndrome                                                                    |
| RAG1     | autosomal recessive severe combined immunodeficiency due to RAG1 deficiency                                                |
| RAG2     | autosomal recessive severe combined immunodeficiency due to RAG2 deficiency                                                |
| RANBP2   | autosomal dominant infection-induced acute necrotizing encephalopathy                                                      |
| RASGRP1  | autosomal recessive RASGRP1 deficiency                                                                                     |
| RBCK1    | autosomal recessive polyglucosan body myopathy with or without immunodeficiency (PGBM1)                                    |
| RELA     | autosomal dominant chronic mucocutaneous ulceration                                                                        |
| RELB     | autosomal recessive combined immunodeficiency due to RELB deficiency                                                       |
| RFX5     | autosomal recessive hereditary major histocompatibility complex (MHC) class II deficiency                                  |
| RFXANK   | autosomal recessive hereditary major histocompatibility complex (MHC) class II deficiency                                  |
| RFXAP    | autosomal recessive hereditary major histocompatibility complex (MHC) class II deficiency                                  |
| RHOH     | autosomal recessive T-cell immunodeficiency with epidermodysplasia verruciformis                                           |
| RIPK1    | autosomal recessive RIPK1 deficiency                                                                                       |
| RMRP     | autosomal recessive cartilage-hair hypoplasia-anauxetic dysplasia (CHH-AD) spectrum disorders                              |
| RNASEH2A | autosomal recessive Aicardi Goutieres syndrome 4 (AGS4)                                                                    |
| RNASEH2B | autosomal recessive Aicardi Goutieres syndrome 2 (AGS2)                                                                    |
| RNASEH2C | autosomal recessive Aicardi Goutieres syndrome 3 (AGS3)                                                                    |
| RNF113A  | X-linked trichothiodystrophy                                                                                               |
| RNF168   | autosomal recessive radiosensitivity, immunodeficiency, dysmorphic features, and learning difficulties (RIDDLE) syndrome   |
| RNF31    | autosomal recessive autoinflammation, immunodeficiency, amylopectinosis, and lymphangiectasia                              |
| RNU4ATAC | autosomal recessive Roifman syndrome and Lowry-Wood syndrome                                                               |
| RORC     | autosomal recessive RORC deficiency                                                                                        |
| RPSA     | autosomal dominant isolated congenital asplenia (ICA) due to RPSA deficiency                                               |
| RTEL1    | autosomal dominant and autosomal recessive dyskeratosis congenita (DC) spectrum disorders                                  |

|          |                                                                                                                                                                     |
|----------|---------------------------------------------------------------------------------------------------------------------------------------------------------------------|
| SAMD9    | autosomal dominant myelodysplasia, infection, restriction of growth, adrenal hypoplasia and insufficiency, genital abnormalities, and enteropathy (MIRAGE) syndrome |
| SAMD9L   | autosomal dominant ataxia-pancytopenia (AP) syndrome                                                                                                                |
| SAMHD1   | autosomal recessive Aicardi-Goutieres syndrome 5 (AGS5)                                                                                                             |
| SAR1B    | autosomal recessive chylomicron retention disease (CMRD)                                                                                                            |
| SCO2     | autosomal recessive cardioencephalomyopathy due to mitochondrial complex IV deficiency                                                                              |
| SEC61A1  | autosomal dominant tubulointerstitial kidney disease                                                                                                                |
| SEMA3E   | chronic kidney disease, seizures and hypothyroidism                                                                                                                 |
| SERPING1 | autosomal dominant hereditary angioedema types I & II                                                                                                               |
| SH2D1A   | X-linked recessive lymphoproliferative syndrome 1 (XLP1)                                                                                                            |
| SH3BP2   | autosomal dominant cherubism                                                                                                                                        |
| SH3KBP1  | X-linked recessive antibody deficiency                                                                                                                              |
| SI       | autosomal recessive sucrase-isomaltase deficiency                                                                                                                   |
| SIAE     | susceptibility to juvenile idiopathic arthritis                                                                                                                     |
| SKIV2L   | autosomal recessive trichohepatoenteric syndrome                                                                                                                    |
| SLC26A3  | autosomal recessive congenital secretory chloride diarrhea                                                                                                          |
| SLC29A3  | autosomal recessive histiocytosis-lymphadenopathy plus syndrome                                                                                                     |
| SLC35C1  | autosomal recessive SLC35C1-congenital disorder of glycosylation (CDG-IIc)                                                                                          |
| SLC37A4  | autosomal recessive glycogen storage disease type Ib (GSD Ib)                                                                                                       |
| SLC39A7  | autosomal recessive agammaglobulinemia due to SLC39A7 deficiency                                                                                                    |
| SLC46A1  | autosomal recessive hereditary folate malabsorption                                                                                                                 |
| SLC5A1   | autosomal recessive glucose-galactose malabsorption (GGM)                                                                                                           |
| SLC7A7   | autosomal recessive lysinuric protein intolerance (LPI)                                                                                                             |
| SLC9A3   | autosomal recessive congenital sodium diarrhea                                                                                                                      |
| SLX4     | autosomal recessive Fanconi anemia, type P (FA-P)                                                                                                                   |
| SMARCAL1 | autosomal recessive Schimke immunoosseous dysplasia (SIOD)                                                                                                          |
| SMARCD2  | autosomal recessive neutrophil-specific granule deficiency                                                                                                          |
| SNX10    | autosomal recessive osteopetrosis                                                                                                                                   |
| SP110    | autosomal recessive hepatic venoocclusive disease with immunodeficiency (VODI)                                                                                      |
| SPINK5   | autosomal recessive Netherton syndrome                                                                                                                              |
| SPINT2   | autosomal recessive congenital sodium diarrhea                                                                                                                      |

|        |                                                                                                                                 |
|--------|---------------------------------------------------------------------------------------------------------------------------------|
| SPPL2A | autosomal recessive mendelian susceptibility to mycobacterial disease                                                           |
| SRP54  | autosomal dominant Shwachman-Diamond syndrome due to SRP54 deficiency                                                           |
| SRP72  | autosomal dominant familial bone marrow failure                                                                                 |
| STAT1  | autosomal recessive STAT1 deficiency and autosomal dominant STAT1 gain-of-function associated chronic mucocutaneous candidiasis |
| STAT2  | autosomal recessive STAT2 deficiency                                                                                            |
| STAT3  | autosomal dominant Hyper-IgE syndrome                                                                                           |
| STAT4  | paracoccidiomycosis                                                                                                             |
| STAT5B | autosomal dominant STAT5B deficiency                                                                                            |
| STIM1  | autosomal dominant tubular aggregate myopathy 1 (TAM1), and autosomal recessive STIM1 deficiency                                |
| STK4   | autosomal recessive combined immunodeficiency due to MST1 deficiency                                                            |
| STN1   | autosomal recessive cerebretinal microangiopathy with calcifications and cysts (CRMCC)                                          |
| STX11  | autosomal recessive familial hemophagocytic lymphohistiocytosis type 4 (FHL4)                                                   |
| STX3   | autosomal recessive microvillus inclusion disease (MVID)                                                                        |
| STXBP2 | autosomal recessive familial hemophagocytic lymphohistiocytosis type 5 (FHL5)                                                   |
| TAOK2  | autosomal recessive primary immunodeficiency                                                                                    |
| TAP1   | autosomal recessive hereditary major histocompatibility complex (MHC) class I deficiency                                        |
| TAP2   | autosomal recessive hereditary major histocompatibility complex (MHC) class I deficiency                                        |
| TAPBP  | autosomal recessive hereditary major histocompatibility complex (MHC) class I deficiency                                        |
| TAZ    | X-linked recessive Barth Syndrome (BTHS), also known as 3-methylglutaconic aciduria type II                                     |
| TBX1   | autosomal dominant DiGeorge/velocardiofacial syndrome                                                                           |
| TCF3   | autosomal dominant agammaglobulinemia due to E47 transcription factor deficiency                                                |
| TCIRG1 | autosomal recessive osteopetrosis due to TCIRG1 deficiency                                                                      |
| TCN2   | autosomal recessive transcobalamin II deficiency                                                                                |
| TERC   | autosomal dominant TERC-related dyskeratosis congenita (DC) spectrum disorders                                                  |
| TERT   | both autosomal dominant and autosomal recessive TERT-related dyskeratosis congenita (DC) spectrum disorders                     |
| TFRC   | autosomal recessive combined immunodeficiency due to TFRC deficiency                                                            |
| TGFB1  | autosomal dominant Camurati-Engelmann disease (CED) and autosomal dominant common variable immunodeficiency                     |
| TGFBR1 | autosomal dominant nonsyndromic thoracic aortic aneurysms and aortic dissections (TAAD)                                         |

|           |                                                                                                                                                                      |
|-----------|----------------------------------------------------------------------------------------------------------------------------------------------------------------------|
| TGFBR2    | autosomal dominant Loeys-Dietz syndrome 2 (LDS2)                                                                                                                     |
| THBD      | autosomal dominant thrombomodulin-associated coagulopathy (TM-AC)                                                                                                    |
| TICAM1    | autosomal recessive susceptibility to herpes simplex encephalitis (HSE)                                                                                              |
| TIMM50    | autosomal recessive 3-methylglutaconic aciduria                                                                                                                      |
| TINF2     | autosomal dominant TINF2-related dyskeratosis congenita (DC) spectrum disorders                                                                                      |
| TLR3      | susceptibility to herpes simplex encephalitis                                                                                                                        |
| TMC6      | autosomal recessive epidermodysplasia verruciformis (EV)                                                                                                             |
| TMC8      | autosomal recessive epidermodysplasia verruciformis (EV)                                                                                                             |
| TMEM173   | autosomal dominant infantile-onset STING-associated vasculopathy (SAVI)                                                                                              |
| TNFAIP3   | autosomal dominant familial Behcet-like autoinflammatory syndrome                                                                                                    |
| TNFRSF11A | autosomal dominant hereditary recurrent fevers                                                                                                                       |
| TNFRSF13B | autosomal recessive common variable immunodeficiency (CVID) due to TACI deficiency                                                                                   |
| TNFRSF13C | autosomal recessive common variable immunodeficiency                                                                                                                 |
| TNFRSF1A  | autosomal dominant tumor necrosis factor receptor-associated periodic syndrome (TRAPS)                                                                               |
| TNFRSF4   | autosomal recessive combined immunodeficiency                                                                                                                        |
| TNFRSF6B  | systemic lupus erythematosus                                                                                                                                         |
| TNFRSF9   | autosomal recessive CD137 deficiency                                                                                                                                 |
| TNFSF11   | autosomal recessive osteopetrosis                                                                                                                                    |
| TNFSF12   | autosomal dominant common variable immunodeficiency (CVID)                                                                                                           |
| TONSL     | autosomal recessive sponastrime dysplasia                                                                                                                            |
| TOP2B     | autosomal dominant TOP2B deficiency                                                                                                                                  |
| TP63      | autosomal dominant acro-dermato-ungual-lacrima-tooth (ADULT) syndrome                                                                                                |
| TPP2      | autosomal recessive tripeptidyl peptidase II deficiency                                                                                                              |
| TRAF3     | autosomal dominant susceptibility to Evans syndrome                                                                                                                  |
| TRAF3IP2  | autosomal recessive ACT1 deficiency                                                                                                                                  |
| TREX1     | autosomal recessive (and rarely, autosomal dominant) Aicardi-Goutieres syndrome 1 (AGS1) and autosomal dominant susceptibility to systemic lupus erythematosus (SLE) |
| TRNT1     | autosomal recessive sideroblastic anemia with B-cell immunodeficiency, periodic fevers, and developmental delay (SIFD)                                               |
| TTC37     | autosomal recessive trichohepatoenteric syndrome (THES) 1                                                                                                            |
| TTC7A     | autosomal recessive immunodeficiency with multiple intestinal atresias                                                                                               |

|         |                                                                                              |
|---------|----------------------------------------------------------------------------------------------|
| TYK2    | autosomal recessive Mendelian susceptibility to mycobacterial disease                        |
| UNC13D  | autosomal recessive familial hemophagocytic lymphohistiocytosis type 3 (FHL3)                |
| UNC45A  | osteo-oto-hepatoenteric syndrome                                                             |
| UNC93B1 | autosomal recessive susceptibility to herpes simplex encephalitis                            |
| UNG     | autosomal recessive Hyper IgM syndrome type 5 (HIGM5)                                        |
| USB1    | autosomal recessive poikiloderma with neutropenia (PN)                                       |
| VAV1    | autosomal dominant common variable immunodeficiency                                          |
| VPS13B  | autosomal recessive Cohen syndrome                                                           |
| VPS45   | autosomal recessive severe congenital neutropenia due to VPS45 deficiency                    |
| WAS     | X-linked recessive Wiskott-Aldrich syndrome and thrombocytopenia                             |
| WDR1    | autosomal recessive WDR1 deficiency                                                          |
| WIPF1   | autosomal recessive Wiskott-Aldrich syndrome due to WIP deficiency                           |
| WRAP53  | autosomal recessive WRAP53-related dyskeratosis congenita (DC) spectrum disorders            |
| XIAP    | X-linked lymphoproliferative syndrome 2 (XLP2)                                               |
| ZAP70   | autosomal recessive combined immunodeficiency due to ZAP70 deficiency                        |
| ZBTB24  | autosomal recessive immunodeficiency-centromeric instability-facial anomalies (ICF) syndrome |
| ZCCHC8  | an autosomal dominant telomere biology disorder                                              |
| ZNF341  | autosomal recessive Hyper-IgE syndrome                                                       |



# Supplementary Figure 1. JMF Physician Questionnaire

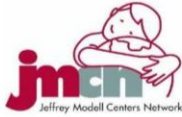

**Jeffrey's Insights**  
**Jeffrey Modell Foundation & Invitae**

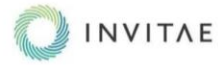

## Genetic Sequencing Program Questionnaire

|            |              |       |
|------------|--------------|-------|
| Physician: | Institution: | Date: |
|------------|--------------|-------|

Please add as many columns as needed for patients.

1. In the past 12 months, approximately how many times did this patient see a healthcare provider for symptoms of the condition?

| Patient 1 | Patient 2 | Patient 3 | Patient 4 | Patient 5 |
|-----------|-----------|-----------|-----------|-----------|
|           |           |           |           |           |

2. In the past 12 months, approximately how many times has this patient:

Been admitted to the hospital?

Visited an emergency room?

Been admitted to the ICU?

|  |  |  |  |  |
|--|--|--|--|--|
|  |  |  |  |  |
|  |  |  |  |  |
|  |  |  |  |  |

3. Was cost a reason this patient did not seek care for this condition?

**Yes or No**

Was cost a reason this patient did not seek genetic testing for this condition?

**Yes or No**

Was access to genetic testing an obstacle for this patient?

**Yes or No**

|  |  |  |  |  |
|--|--|--|--|--|
|  |  |  |  |  |
|  |  |  |  |  |
|  |  |  |  |  |

4. What is the annual estimated cost of care, medications, and treatment for this patient?

|  |  |  |  |  |
|--|--|--|--|--|
|  |  |  |  |  |
|--|--|--|--|--|

5. Are the costs of care covered by the patient's insurance company or national health program?

**Yes or No**

Are the costs of genetic testing covered by the patient's insurance company or national health program?

**Yes or No**

|  |  |  |  |  |
|--|--|--|--|--|
|  |  |  |  |  |
|  |  |  |  |  |

6. Prior to genetic testing, did you have a suspicion of a particular diagnosis for this patient?

**Yes or No**

If **Yes**, did the results **confirm** or **alter** this?

(Please enter **confirm** or **alter**)

|  |  |  |  |  |
|--|--|--|--|--|
|  |  |  |  |  |
|  |  |  |  |  |

7. Based on the results of genetic testing, have you altered any of the following for this patient:

Clinical diagnosis?

**Yes or No**

Overall disease management?

**Yes or No**

Treatment?

**Yes or No**

Genetic counseling?

**Yes or No**

|  |  |  |  |  |
|--|--|--|--|--|
|  |  |  |  |  |
|  |  |  |  |  |
|  |  |  |  |  |
|  |  |  |  |  |

8. Based on the results of genetic testing, have you identified other at-risk or affected individuals in this family?

**Yes or No**

|  |  |  |  |  |
|--|--|--|--|--|
|  |  |  |  |  |
|--|--|--|--|--|

9. Based on the results of genetic testing, have there been any changes in outcomes for this patient to date?

**Yes or No**

|  |  |  |  |  |
|--|--|--|--|--|
|  |  |  |  |  |
|--|--|--|--|--|

10. Is there an approved therapy for the diagnosis?

**Yes or No**

|  |  |  |  |  |
|--|--|--|--|--|
|  |  |  |  |  |
|--|--|--|--|--|

11. Has this patient been diagnosed with COVID-19?

Yes or No

If Yes, what is the current status/outcome?

|  |  |  |  |  |
|--|--|--|--|--|
|  |  |  |  |  |
|  |  |  |  |  |

12. Has this patient received treatment(s) for COVID-19?

Yes or No

If Yes, what treatment(s)?

|  |  |  |  |  |
|--|--|--|--|--|
|  |  |  |  |  |
|  |  |  |  |  |

Additional Comments:

|  |
|--|
|  |
|--|
